# Supplementary material for: Kinetics of electric field induced vertical orientation of halloysite nanotubes in photocurable nanocomposites
Source: Royal Society of Chemistry journal article supplement (doi:10.1039/c9na00369j), 2019-01-01
Supplement: c9na00369j1.pdf [file c9na00369j1.pdf]

## Supporting Information

### Kinetics of Electric Field Induced Vertical Orientation of Halloysite Nanotubes in Photocurable Nanocomposite

Shuyang Pan<sup>a†</sup>, Yuanhao Guo<sup>a†</sup>, Yuwei Chen<sup>a b</sup> and Miko Cakmak<sup>\*ac</sup>

*a* Department of Polymer Engineering, University of Akron, Akron, Ohio 44325, USA

*b* Key Laboratory of Rubber-Plastics, Ministry of Education/Shandong Provincial Key Laboratory of Rubber-Plastics, Qingdao University of Science & Technology, Qingdao 266042, China

*c* School of Materials Engineering, School of Mechanical Engineering and Birck Nanotechnology Center, Purdue University, West Lafayette, IN, 47907, USA

<sup>†</sup> Shuyang Pan and Yuanhao Guo contributed equally to the manuscript and this manuscript was written through contributions of all authors.

E-mail: [cakmak@purdue.edu](mailto:cakmak@purdue.edu)

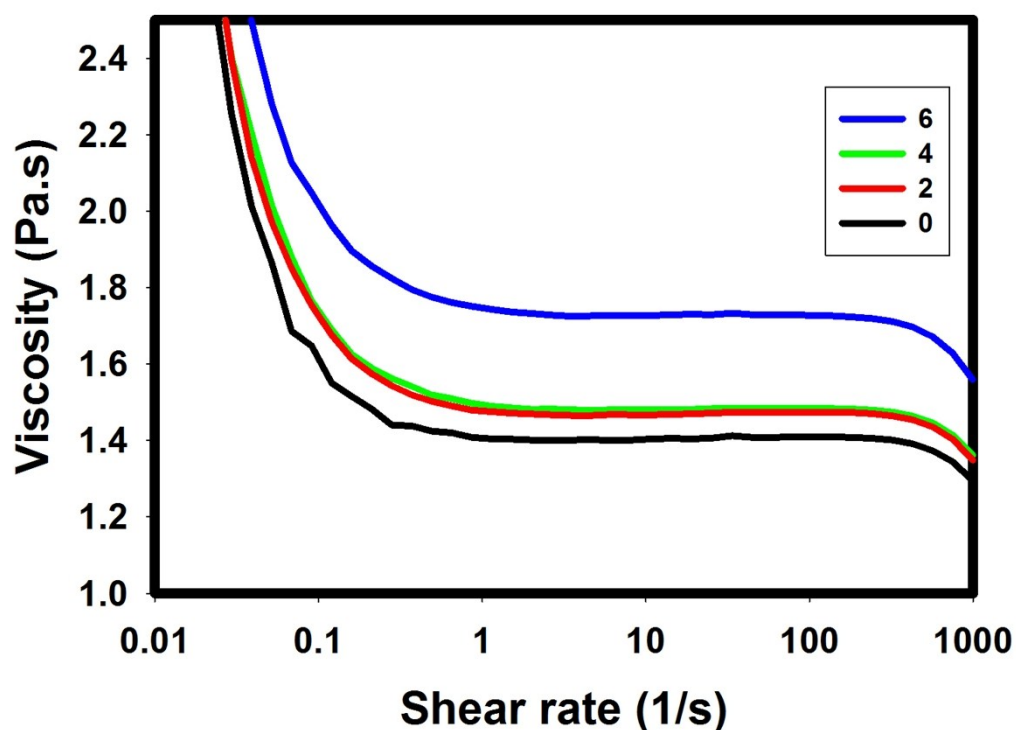

Figure S1. The effect of HNTs content on viscosity.
